# Supplementary material for: Proteomic Analysis of Early Diabetic Retinopathy Reveals Mediators of Neurodegenerative Brain Diseases
Source: PubMed Central journal article supplement — Invest Ophthalmol Vis Sci. 2018 May;59(6):2264–74. doi: 10.1167/iovs.17-23678 (PMC5935294; doi:10.1167/iovs.17-23678), 2018-05
Supplement: iovs-59-05-28_s01.pdf [file iovs-59-05-28_s01.pdf]

## **SUPPLEMENTAL DATA**

*Manuscript title: "Proteomic analysis of early diabetic retinopathy reveals mediators of neurodegenerative brain diseases".*

LINK: <https://drive.google.com/open?id=1BqxmEsbWD-xAZv289gXsJ32oiIqhjIOU>
